# Supplementary material
Source: PubMed Central journal article supplement (PMC3615653)
Supplement: embor201316s1.pdf [file embor201316s1.pdf]

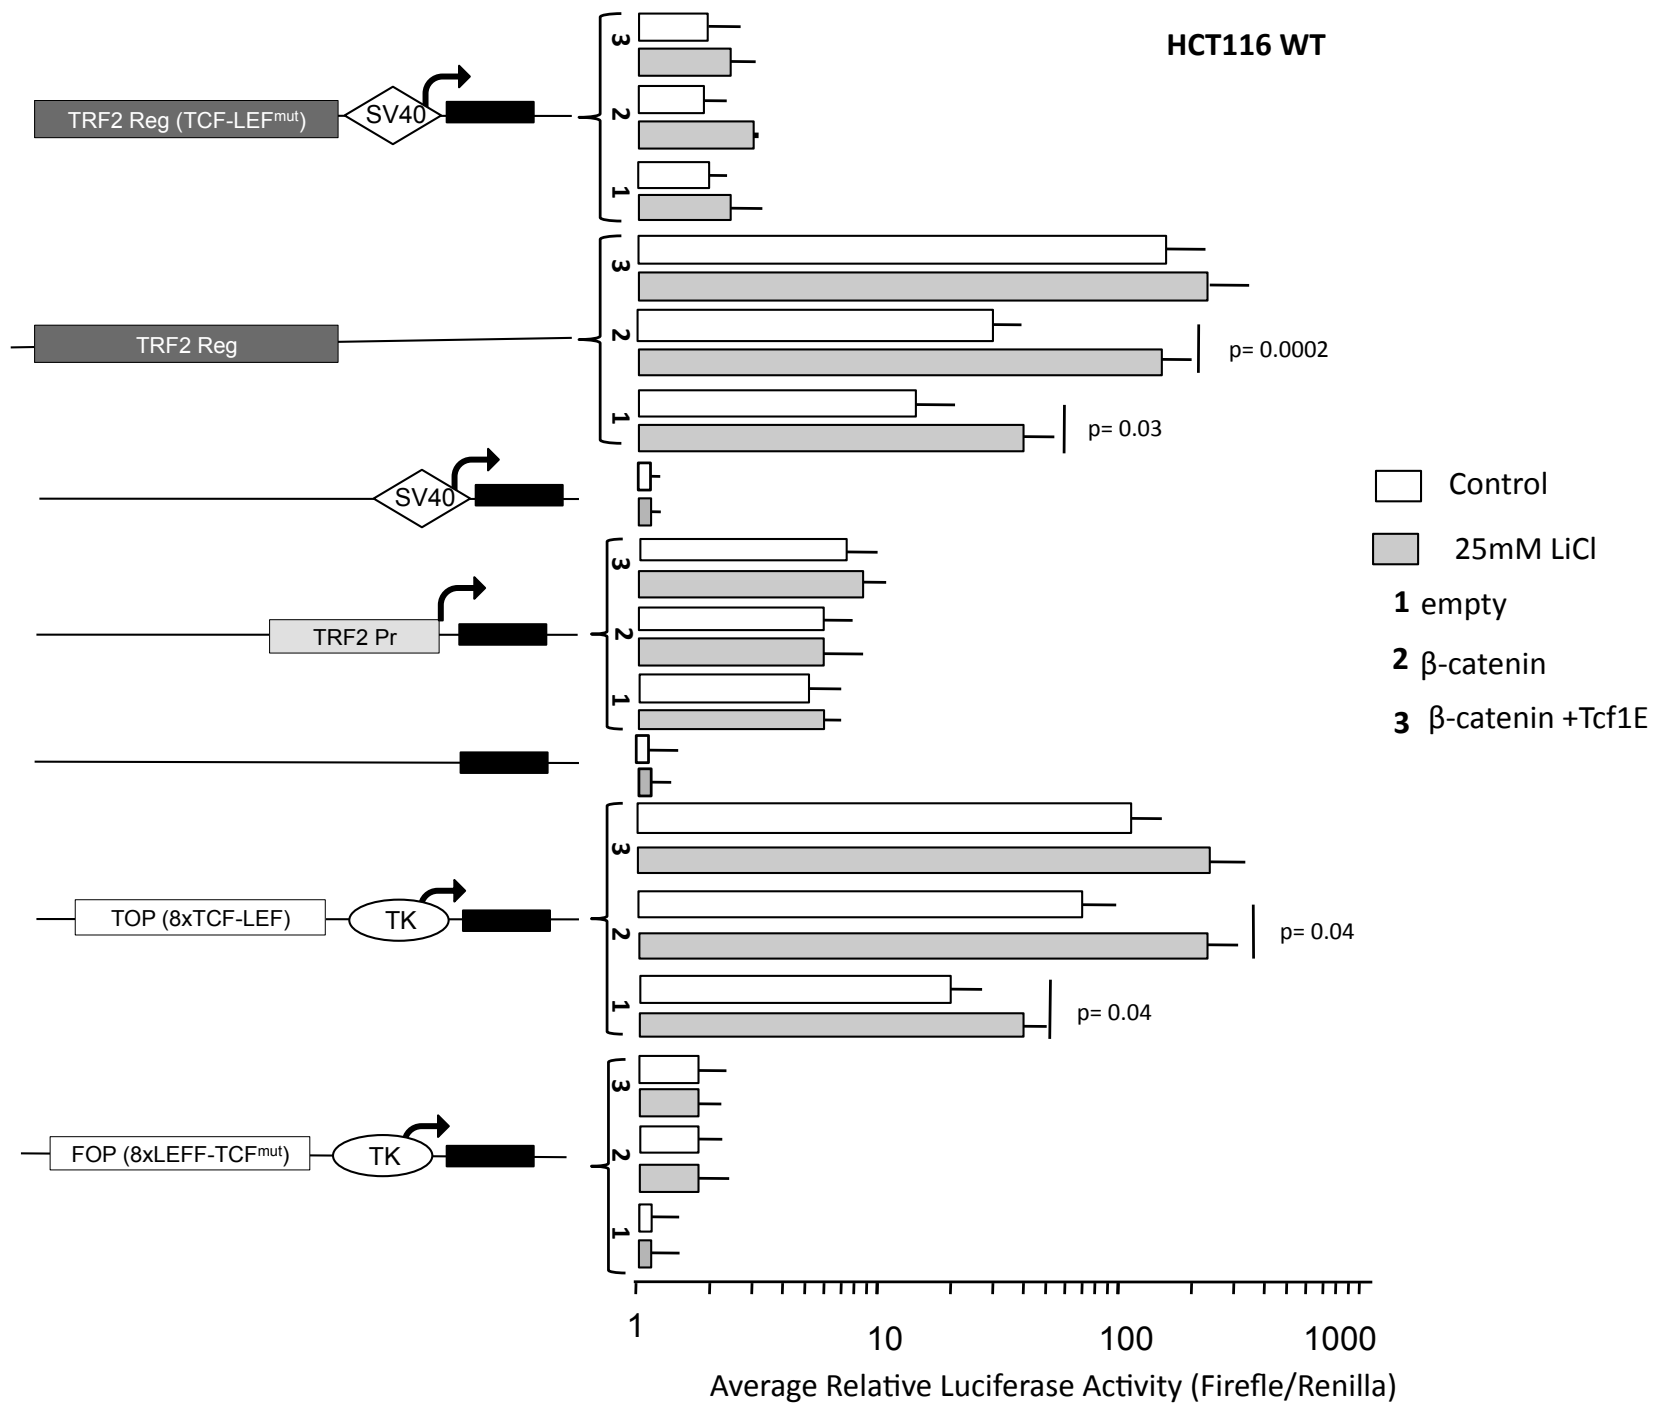

Figure S1

**Supplementary Figure S1.** Effect of LiCl on the transactivation properties of the Reg region of TRF2. The various reporter constructs derived from the pLG-3/Prom plasmid (for the *TERF2* Reg sequence) and pLG-3/basic (for the *TERF2* Prom sequence). TCF-LEF<sup>mut</sup>: all the TCF-LEF sites are inactivated by mutation. TOP-Flash and FOP-Flash are positive and negative controls, respectively, for  $\beta$ -catenin/TCF transactivation. Data show average relative luciferase activity in HCT116 cells and represent the mean  $\pm$  s.e.m. ( $n = 6$ ). Statistical significance of data was assessed using Bonferroni Multiple Comparison Test.

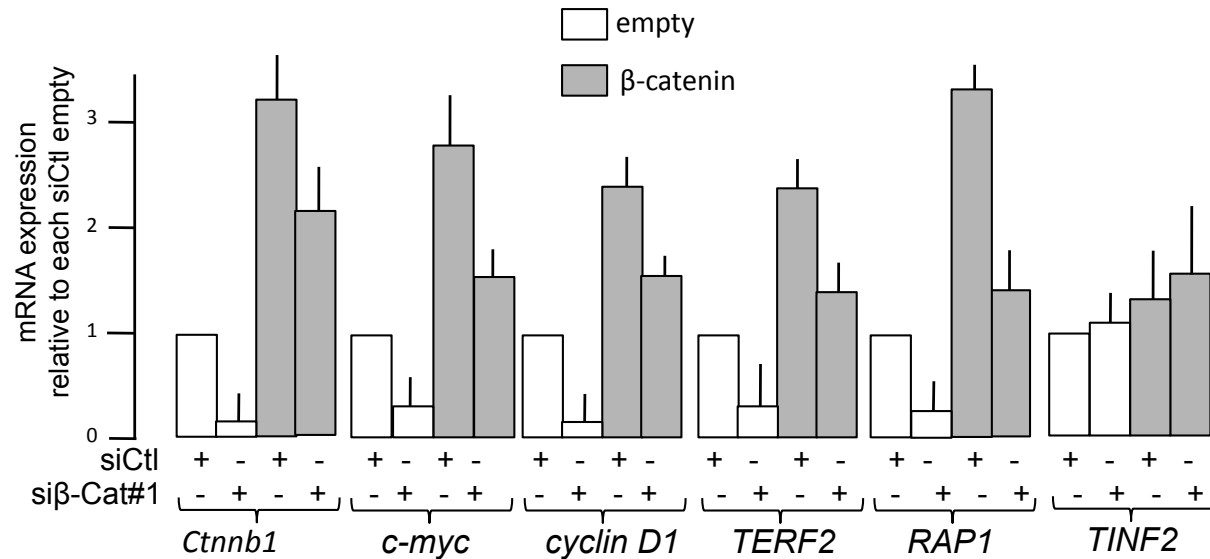

**Supplementary Figure S2.**  $\beta$ -Catenin regulates the expression of TRF2 and Rap1 in HepG2 cells. After siRNA-mediated  $\beta$ -catenin knockdown, we performed real-time RT-qPCR analysis to evaluate the mRNA expression of  $\beta$ -catenin, two known targets of the canonical Wnt signaling (*cyclin D1* and *c-Myc*), *TERF2*, *RAP1* and *TINF2*. Knocked-down  $\beta$ -catenin expression was rescued by  $\beta$ -catenin overexpression. Error bar represents the mean  $\pm$  s.e.m for 6 independent experiments.

Figure S2

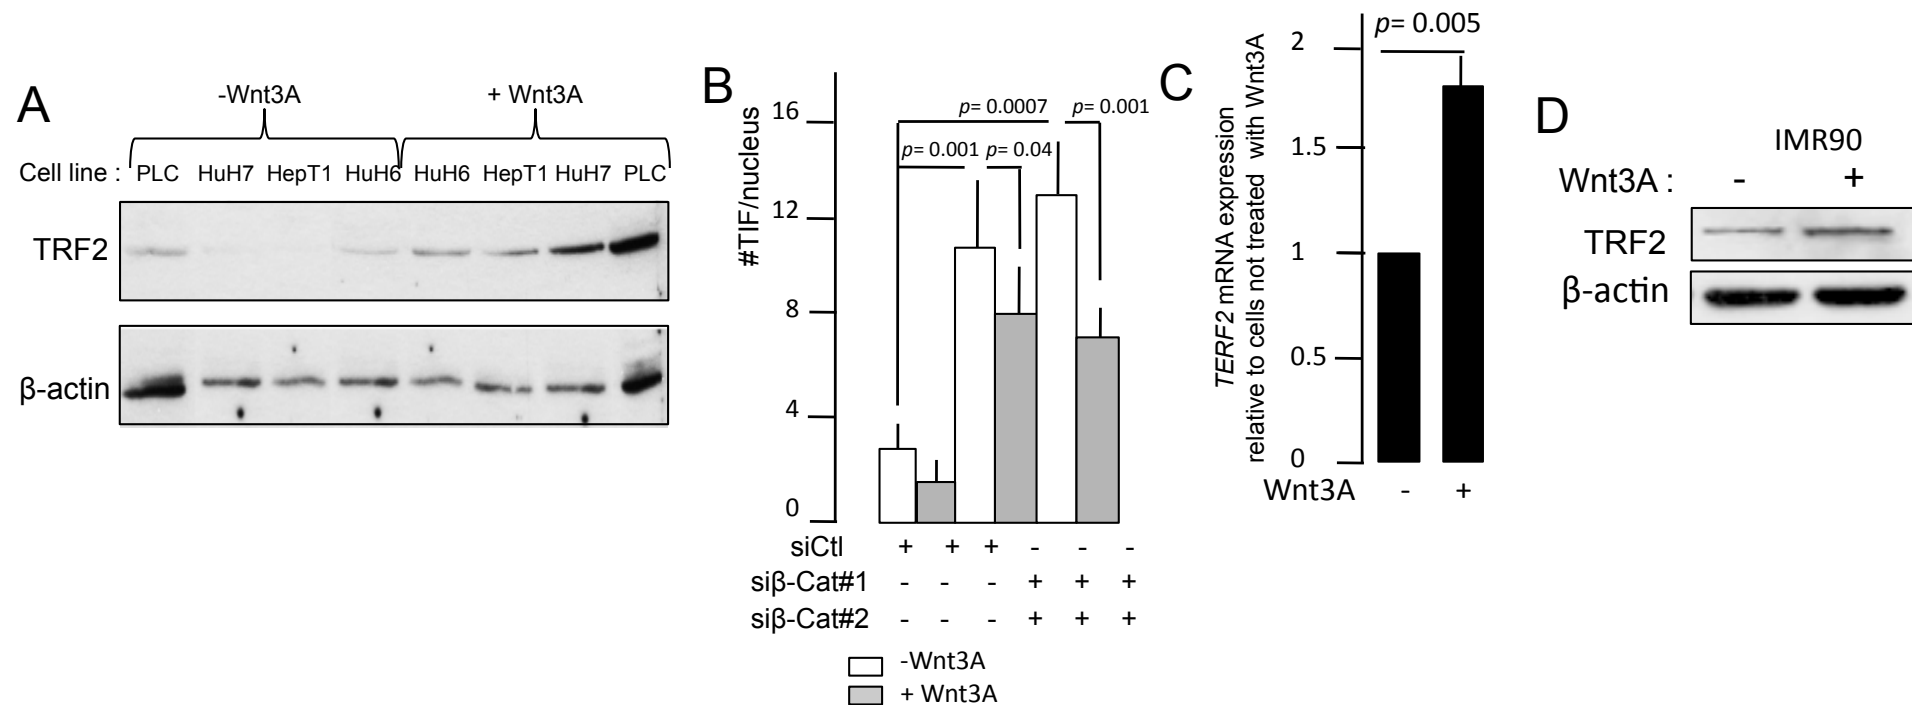

**Supplementary Figure S3.** (A) The level of TRF2 protein increases in various hepatoma cell lines upon treatment with Wnt3A. Cell lines without known  $\beta$ -catenin mutation : PLC is for PLC/PRF/5 hepatoma cell line and HuH7; cell lines with known  $\beta$ -catenin mutation : HepT1 and HuH6. (B) shows number of TIFs per nucleus observed for each condition using PLC/PRF/5 cells. p value was determined using student T-test. At least 40 nuclei per condition were analyzed. (C) *TERF2* mRNA level in IMR90 cells with and without Wnt3A. (D) TRF2 level in IMR90 cells with and without Wnt3A. For panels B and C, error bar represents the mean  $\pm$  s.e.m for 3 independent experiments.

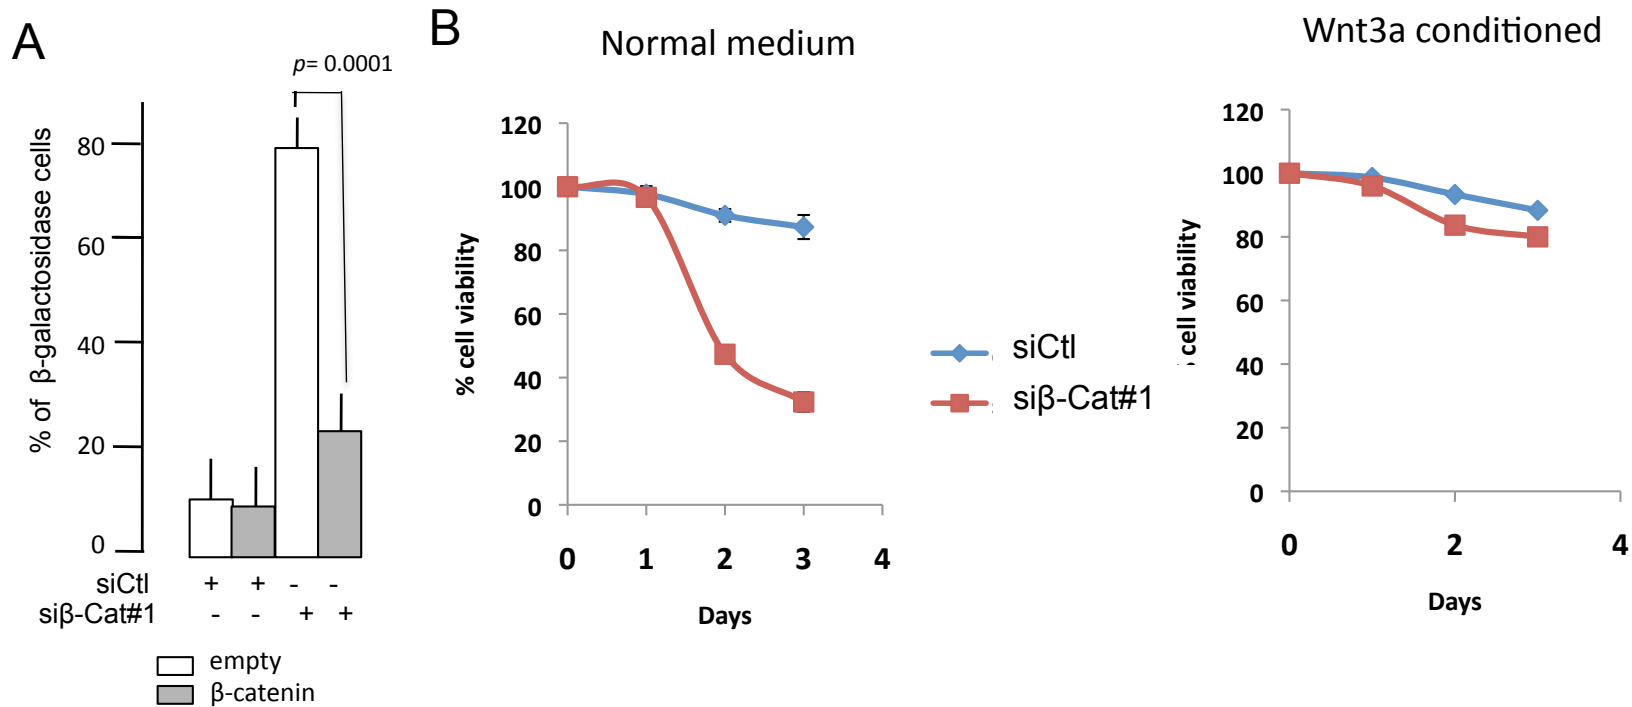

**Supplementary Figure S4.** (A) The bar graph represents the total count of HCT116 cells that are stained with  $\beta$ -galactosidase. p value was determined using student T-test. Error bar represents the mean  $\pm$  s.e.m. (B) Data shows cell viability count per day of HCT116 cells upon *Ctnnb1* knock-down as measured using trypan blue staining.

Supplementary Table S1 : mean Ct values (n=4) of the ChIP samples obtained from HCT116 with and without  $\beta$ -catenin and Tcf1E overexpression.

| Experiment                              | ChIP               | Ct Pa | Ct H4 pr | $\Delta Ct =$         |                           | Fold enrichment Pa/H4<br>, normalized to input | standard error |
|-----------------------------------------|--------------------|-------|----------|-----------------------|---------------------------|------------------------------------------------|----------------|
|                                         |                    |       |          | $Ct_{Pa} - Ct_{H4pr}$ | $Pa/H4 = 1/2^{\Delta Ct}$ |                                                |                |
| HCT116<br>empty                         | <i>Input</i>       | 23,57 | 21,84    | 1,730                 | 0,301                     |                                                |                |
|                                         | <i>Ab beta-cat</i> | 28,72 | 29,44    | -0,720                | 1,647                     | 5,47                                           | 1,041          |
|                                         | <i>No Ab</i>       | 34    | 32,08    | 1,920                 | 0,264                     | 0,88                                           | 0,85           |
| HCT116<br>+ $\beta$ -catenin            | <i>Input</i>       | 23,34 | 21,58    | 1,760                 | 0,295                     |                                                |                |
|                                         | <i>Ab beta-cat</i> | 26,40 | 28,45    | -2,050                | 4,141                     | 14                                             | 0,4            |
|                                         | <i>No Ab</i>       | 32,24 | 29,07    | 3,170                 | 0,111                     | 0,37                                           | 0,42           |
| HCT116<br>+ $\beta$ -catenin<br>+ Tcf1E | <i>Input</i>       | 23,75 | 21,52    | 2,230                 | 0,213                     |                                                |                |
|                                         | <i>Ab beta-cat</i> | 28,90 | 30,83    | -1,930                | 3,811                     | 17,9                                           | 0,24           |
|                                         | <i>No Ab</i>       | 32,72 | 30,48    | 2,240                 | 0,212                     | 1                                              | 0,12           |
|                                         |                    | Ct Pb | Ct H4 Pr | $\Delta Ct =$         |                           | Pb/H4 = $1/2^{\Delta Ct}$                      |                |
|                                         |                    |       |          | $Ct_{Pb} - Ct_{H4Pr}$ |                           |                                                |                |
| HCT116<br>empty                         | <i>Input</i>       | 23,63 | 21,84    | 1,790                 | 0,289                     |                                                |                |
|                                         | <i>Ab beta-cat</i> | 31,20 | 29,44    | 1,760                 | 0,295                     | 1                                              | 32             |
|                                         | <i>No Ab</i>       | 33,78 | 32,08    | 1,700                 | 0,308                     | 1                                              | 0,225          |
| HCT116<br>+ $\beta$ -catenin            | <i>Input</i>       | 23,87 | 21,58    | 2,290                 | 0,204                     |                                                |                |
|                                         | <i>Ab beta-cat</i> | 30,67 | 28,45    | 2,220                 | 0,215                     | 1,075                                          | 0,22           |
|                                         | <i>No Ab</i>       | 31,45 | 29,07    | 2,380                 | 0,192                     | 0,94                                           | 0,44           |
| HCT116<br>+ $\beta$ -catenin<br>+ Tcf1E | <i>Input</i>       | 23,88 | 21,52    | 2,360                 | 0,195                     |                                                |                |
|                                         | <i>Ab beta-cat</i> | 33,00 | 30,83    | 2,170                 | 0,222                     | 1,13                                           | 0,47           |
|                                         | <i>No Ab</i>       | 33,67 | 30,48    | 3,190                 | 0,110                     | 0,56                                           | 0,38           |

Supplementary Table S2 : Sequence of the qPCR primers used for the ChIP experiment of Figure 2

|           |                                                                          |
|-----------|--------------------------------------------------------------------------|
| Pa        | F 5' - GTCAGAGCTTCAATGCCAAA - 3'<br>R 5' - GAGCAAGCAAGAAAGCACAC - 3'     |
| Pb        | F 5' - CTCAAAGTCAGTACCACATTTTCC - 3'<br>R 5' - AGGGTTTGGTCACCCTTGTT - 3' |
| P1        | F 5' - CCATTTGGTTTTCCGAAG - 3'<br>R 5' - GCCTGAAAGAAGCATCCAGA - 3'       |
| P2        | F 5' - TCTTGTCCAGGGAAGACTCG - 3'<br>R 5' - CCACACCCAGCTTAAACCAT - 3'     |
| P3        | F 5' - TGCACTTTAACCCGGAATCT - 3'<br>R 5' - GCGCATTGAAGAAGGAGAAA - 3'     |
| H4 pr     | F 5' - TGTGTGATGGGAAGATGGGA - 3'<br>R 5' - GAGCAAAATAGCGAGACCCC - 3'     |
| Villin pr | F 5' - CAGACATACATGCAGGCAAAA - 3'<br>R 5' - CCAGATCCCTCTTCAGTGTGT - 3'   |
