# Supplementary material
Source: PubMed Central journal article supplement (PMC3615653)
Supplement: embor201316s2.pdf [file embor201316s2.pdf]

Manuscript EMBOR-2012-36507

## **Telomere protection and TRF2 expression are enhanced by the canonical Wnt signaling pathway**

Irmina Diala, Nicole Wagner, Frederique Magdinier, Marina Shkreli, Maria Sirakov, Serge Bauwens, Caroline Schluth-Bolard, Thomas Simonet, Valerie M. Renault, Jing Ye, Abdelnadir Djerbi, Pascal Pineau, Jinkuk Choi, Steven Artandi, Anne Dejean, Michelina Plateroti and Eric Gilson

*Corresponding author: Eric Gilson, University of Nice*

---

### **Review timeline:**

Submission date:

14 August 2012

Accepted:

28 January 2013

---

### **Transaction Report:**

No Peer Review Process File is available with this article, as the authors have chosen not to make the review process public in this case.
